# Supplementary material for: Structural basis for disruption of claudin assembly in tight junctions by an enterotoxin
Source: PubMed Central journal article supplement (PMC5028891; doi:10.1038/srep33632), 2016-09-20
Supplement: srep33632-s1.pdf [file srep33632-s1.pdf]

## Supplementary Information

### **Structural basis for disruption of claudin assembly in tight junctions by an enterotoxin**

Takehiro Shinoda<sup>1,2</sup>, Naoko Shinya<sup>1,2</sup>, Kaori Ito<sup>1,2</sup>, Noboru Ohsawa<sup>1,2</sup>, Takaho Terada<sup>1,3</sup>,  
Kunio Hirata<sup>4</sup>, Yoshiaki Kawano<sup>4</sup>, Masaki Yamamoto<sup>4</sup>, Tomomi Kimura-Someya<sup>1,2</sup>,  
Shigeyuki Yokoyama<sup>1,3\*</sup>, Mikako Shirouzu<sup>1,2\*</sup>

<sup>1</sup>RIKEN Systems and Structural Biology Center, 1-7-22 Suehiro-cho, Tsurumi-ku,  
Yokohama 230-0045, Japan.

<sup>2</sup>Division of Structural and Synthetic Biology, RIKEN Center for Life Science  
Technologies, 1-7-22 Suehiro-cho, Tsurumi-ku, Yokohama 230-0045, Japan.

<sup>3</sup>RIKEN Structural Biology Laboratory, 1-7-22 Suehiro-cho, Tsurumi-ku, Yokohama  
230-0045, Japan.

<sup>4</sup>RIKEN SPring-8 Center, 1-1-1, Kouto, Sayo-cho, Sayo-gun, Hyogo 679-5148, Japan.

\*Correspondence to: E-mail: yokoyama@riken.jp (S.Y.); mikako.shirouzu@riken.jp  
(M.S.)

**Supplementary Table S1** Data collection and refinement statistics

|                                                     | Native                                    | Native                                                      | SeMet                                                 |
|-----------------------------------------------------|-------------------------------------------|-------------------------------------------------------------|-------------------------------------------------------|
|                                                     | T4L-claudin-4<br>•SeMet C-CPE<br>(BL41XU) | T4L-claudin-4<br>•SeMet C-CPE<br>(BL32XU <sup>27,28</sup> ) | T4L-claudin-4<br>•SeMet C-CPE<br>(BL32XU)             |
| <b>Data collection</b>                              |                                           |                                                             |                                                       |
| Space group                                         | <i>P4</i> <sub>3</sub>                    | <i>P4</i> <sub>3</sub>                                      | <i>P4</i> <sub>3</sub> <i>2</i> <sub>1</sub> <i>2</i> |
| No. crystals                                        | 1                                         | 1                                                           | 1                                                     |
| Cell dimensions                                     |                                           |                                                             |                                                       |
| <i>a</i> , <i>b</i> , <i>c</i> (Å)                  | 105.9, 105.9, 244.3                       | 105.7, 105.7, 244.2                                         | 98.4, 98.4, 244.6                                     |
| $\alpha$ , $\beta$ , $\gamma$ (°)                   | 90, 90, 90                                | 90, 90, 90                                                  | 90, 90, 90                                            |
| Resolution (Å)                                      | 50-3.35 (3.44-3.35)*                      | 50-4.20 (4.31-4.20)                                         | 50-4.20 (4.45-4.19)                                   |
| <i>R</i> <sub>meas</sub>                            | 0.161 (2.657)                             | 0.201 (1.398)                                               | 0.215 (1.355)                                         |
| <i>I</i> / $\sigma$ <i>I</i>                        | 6.63 (0.48)                               | 6.90 (1.44)                                                 | 8.49 (1.84)                                           |
| Completeness (%)                                    | 99.6 (98.8)                               | 99.8 (98.5)                                                 | 99.7 (98.5)                                           |
| Redundancy                                          | 4.55 (4.18)                               | 6.05 (5.80)                                                 | 8.37 (8.25)                                           |
| CC* **                                              | 0.999 (0.485)                             |                                                             |                                                       |
| <b>Refinement</b>                                   |                                           |                                                             |                                                       |
| Resolution (Å)                                      | 48.59-3.50                                |                                                             |                                                       |
| No. reflections                                     | 33738                                     |                                                             |                                                       |
| <i>R</i> <sub>work</sub> / <i>R</i> <sub>free</sub> | 0.29 / 0.31                               |                                                             |                                                       |
| No. atoms                                           |                                           |                                                             |                                                       |
| Protein                                             | 14200                                     |                                                             |                                                       |
| Ligand/ion                                          | 0                                         |                                                             |                                                       |
| Water                                               | 0                                         |                                                             |                                                       |
| B-factors                                           |                                           |                                                             |                                                       |
| Protein                                             | 99.91                                     |                                                             |                                                       |
| Ligand/ion                                          | 0                                         |                                                             |                                                       |
| Water                                               | 0                                         |                                                             |                                                       |
| R.m.s. deviations                                   |                                           |                                                             |                                                       |
| Bond lengths (Å)                                    | 0.005                                     |                                                             |                                                       |
| Bond angles (°)                                     | 1.172                                     |                                                             |                                                       |

\*Highest resolution shell is shown in parentheses.

\*\*CC\* was calculated with the program Calculate CC\* in the PHENIX suite<sup>26</sup>.

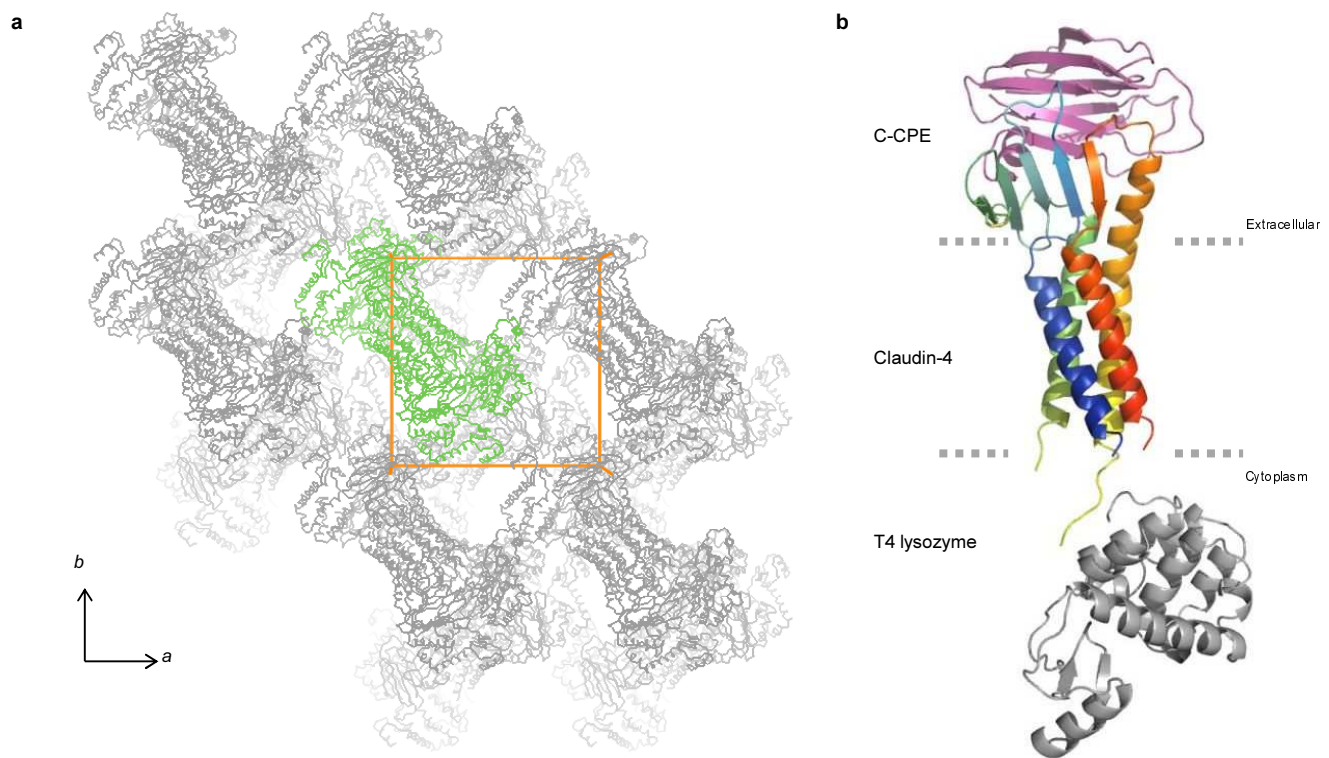

**Supplementary Figure S1 | Crystal packing.** (a) Crystal packing of the T4L-claudin-4•C-CPE complex in space group  $P4_3$ , as displayed on the  $a$ – $b$  plane. (b) Overview of the T4L-claudin-4•C-CPE complex. Claudin-4 and C-CPE are colored as in Fig. 1, and T4L is colored gray.

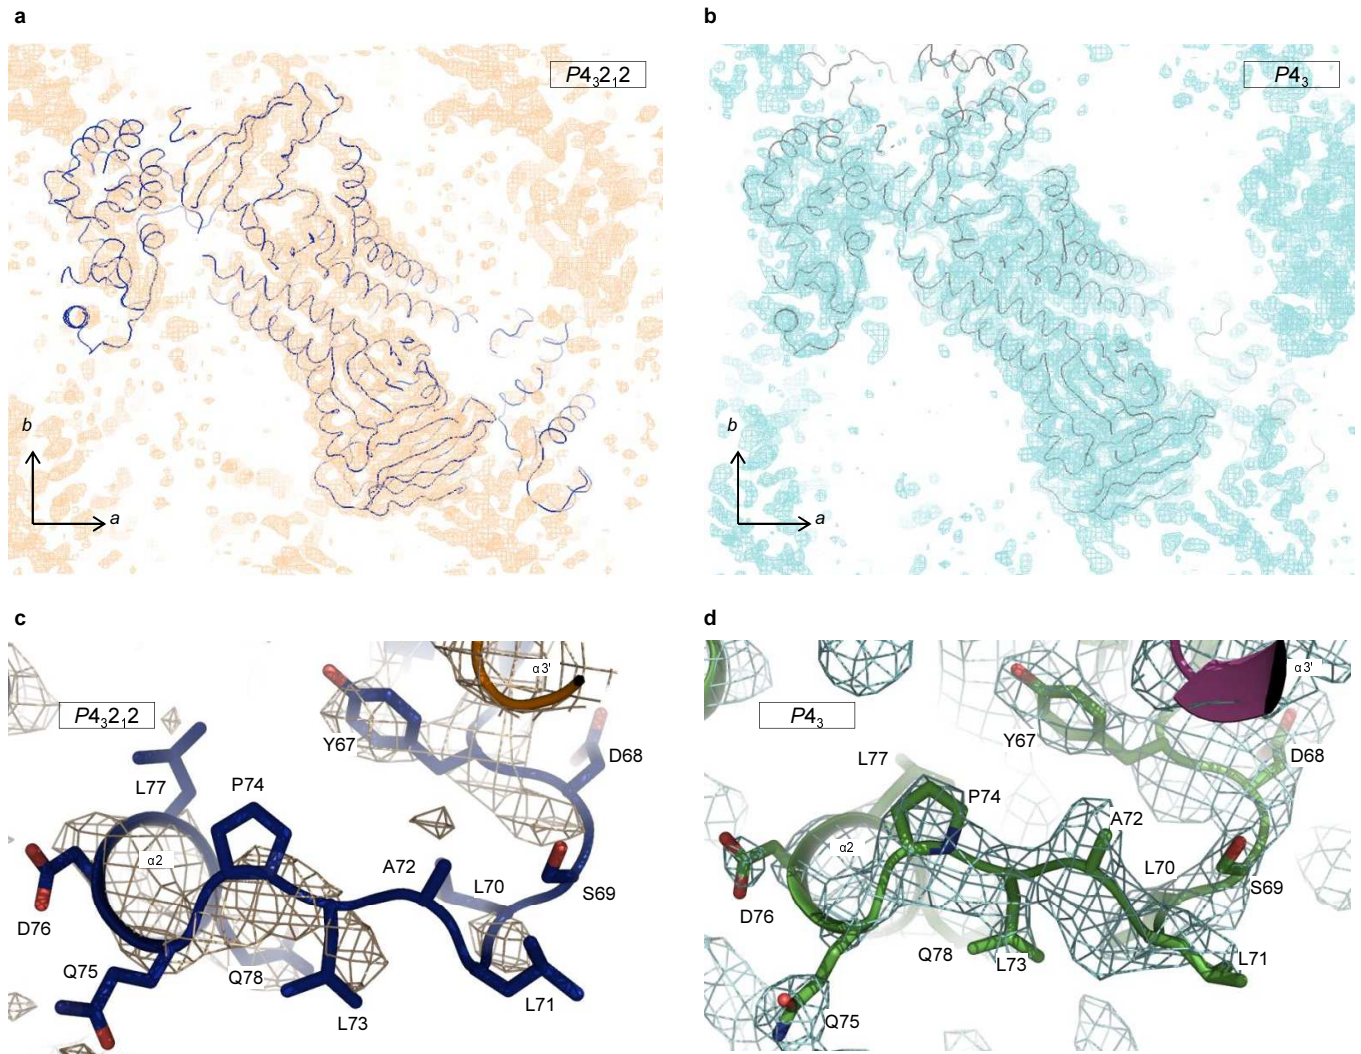

**Supplementary Figure S2 | Comparison between the  $P4_32_12$  crystal structure of the SeMet-T4L-claudin-4•SeMet-C-CPE complex and the  $P4_3$  crystal of the T4L-claudin-4•C-CPE complex.** (a, b) Overview of the asymmetric unit of the  $P4_32_12$  crystal of the SeMet-T4L-claudin-4•SeMet-C-CPE complex (a) and the  $P4_3$  crystal of the T4L-claudin-4•C-CPE complex (b), with  $2F_o-F_c$  maps at 4.2 Å and 3.5 Å, respectively. (c, d) The  $\beta_4$ - $\alpha_2$  loop in the  $P4_32_12$  crystal (c) and the  $P4_3$  crystal (d) with  $2F_o-F_c$  map. The  $2F_o-F_c$  maps are contoured at 1.5  $\sigma$ .

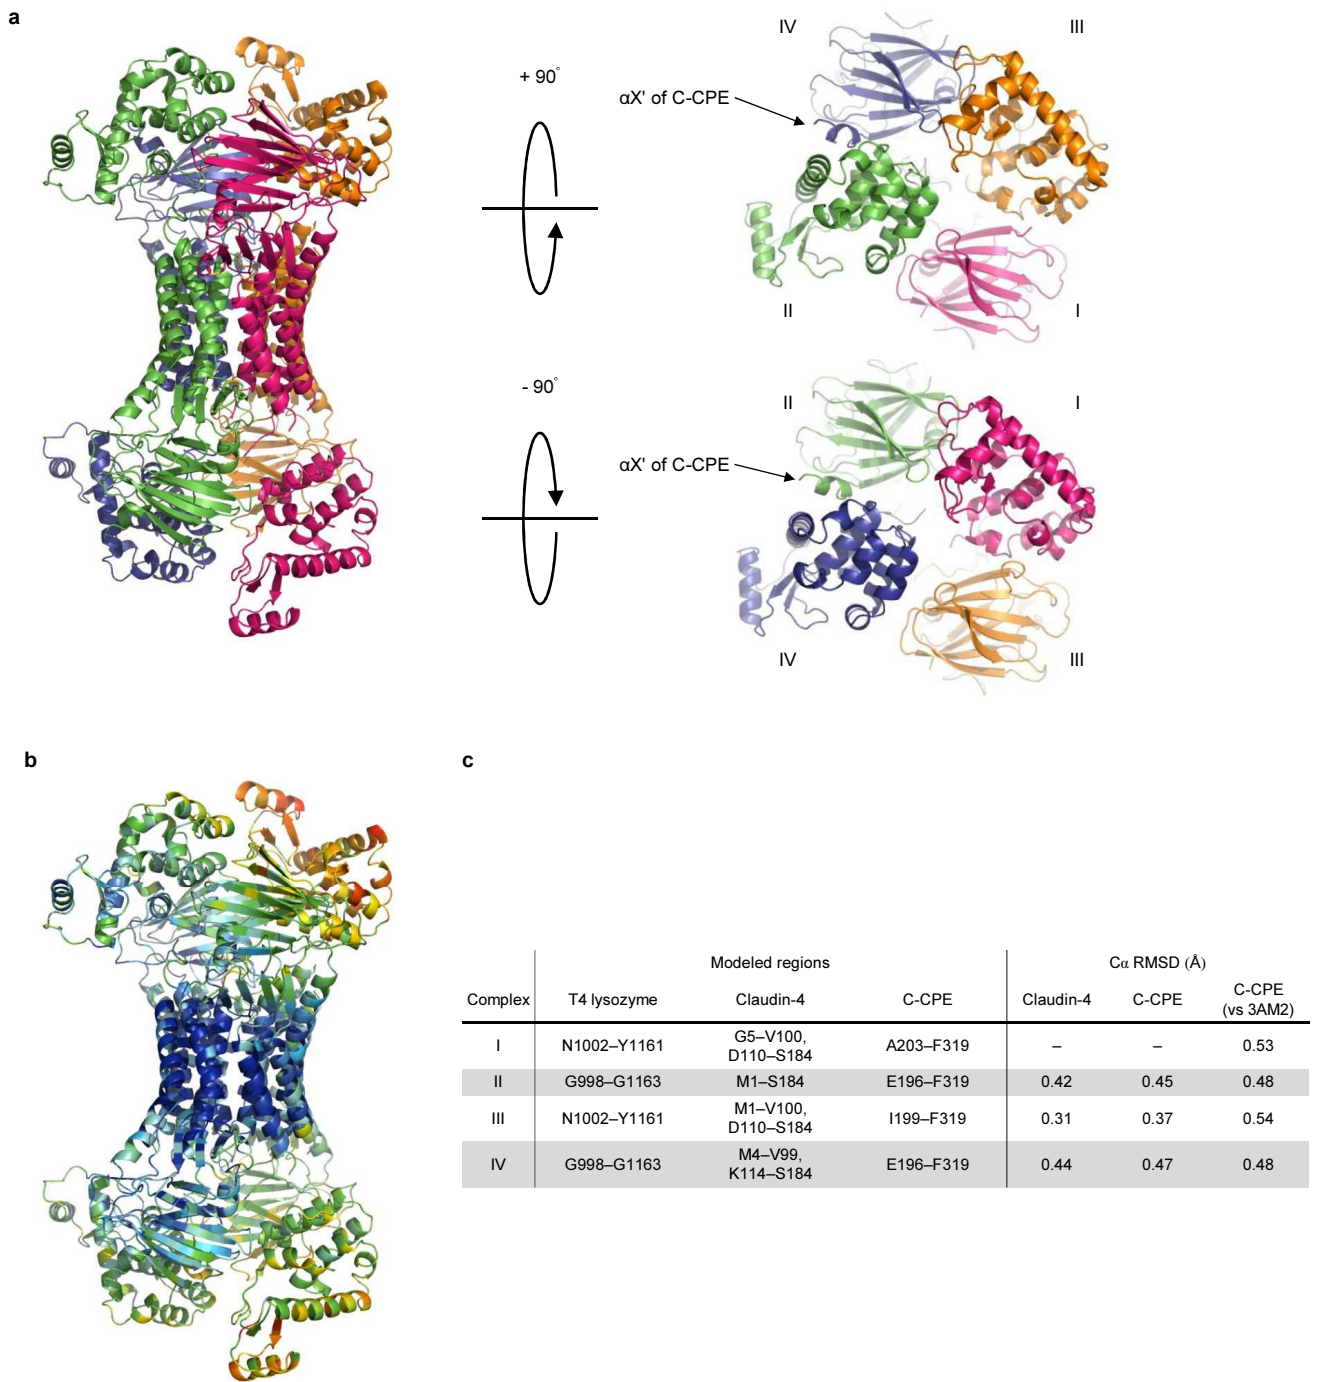

**Supplementary Figure S3 | Four complexes of T4L-human claudin-4•C-CPE in the asymmetric unit of the  $P4_3$  crystal.** (a) The asymmetric unit of the  $P4_3$  crystal of the T4L-claudin-4•C-CPE complex contains four complexes: I (pink), II (green), III (orange), and IV (dark blue). (b) The temperature factors of the C $\alpha$  atoms, ranging from 46 Å<sup>2</sup> (blue) to 207 Å<sup>2</sup> (red), on the four complexes in the asymmetric unit of the  $P4_3$  crystal of the T4L-claudin-4•C-CPE complex. (c) Comparison of the structural models between the four independent complexes in the  $P4_3$  crystal of the T4L-claudin-4•C-CPE complex. The root-mean-square deviations of the C $\alpha$  atoms were calculated by the program PyMOL.



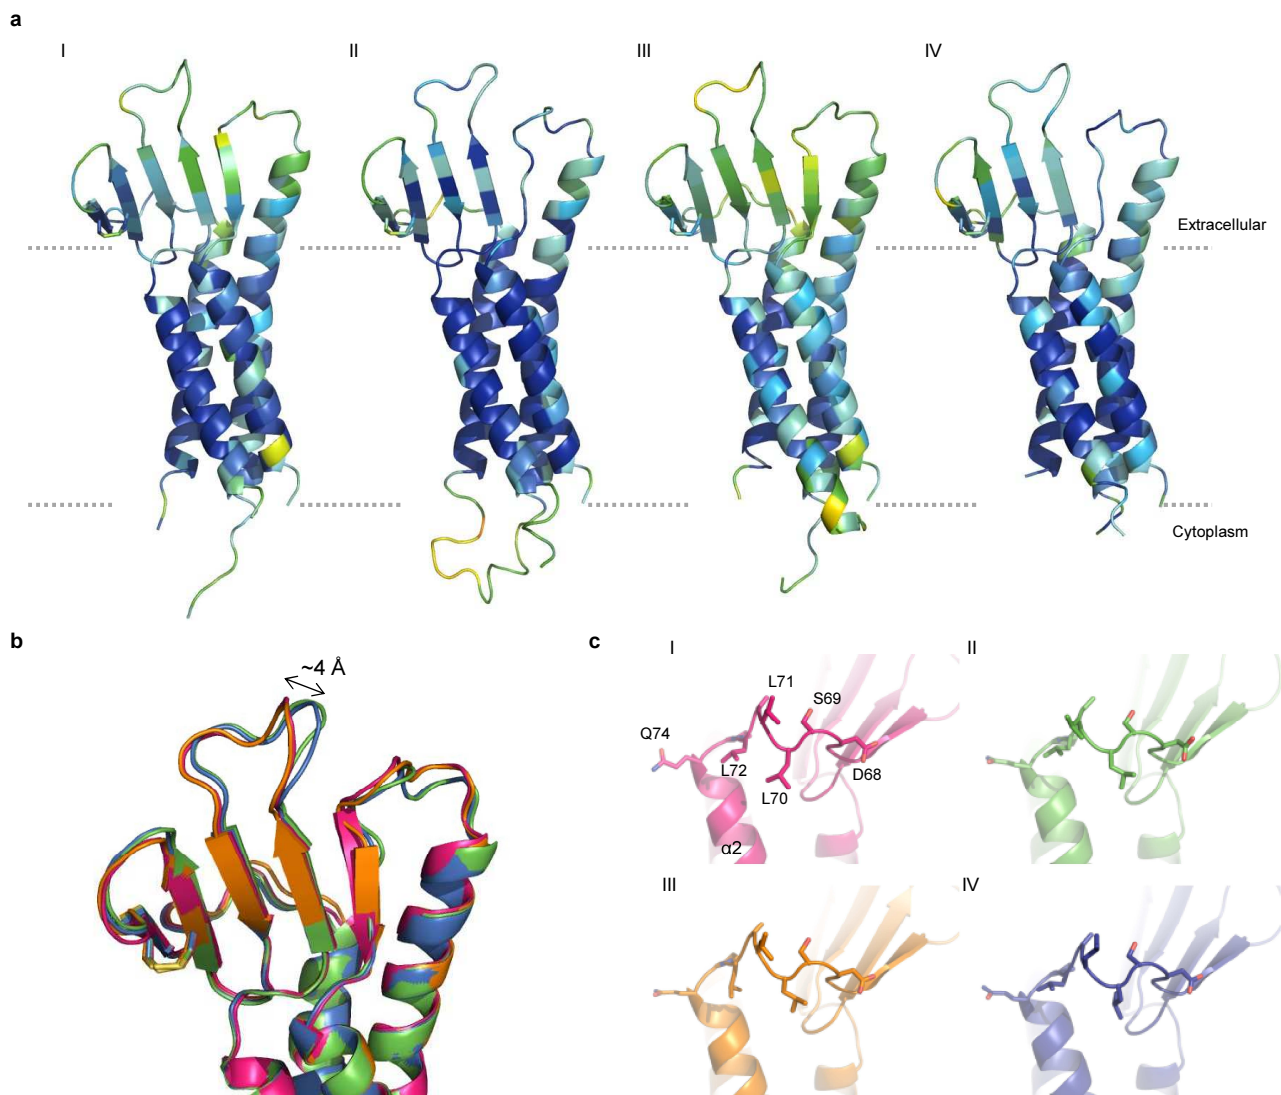

**Supplementary Figure S4 | Comparison of the four structures of human claudin-4 in the asymmetric unit.** (a) The overall structures of human claudin-4 from the four complexes with color-coded temperature factors of the C $\alpha$  atoms, determined in the same manner as in Supplementary Fig. S3b. (b, c) Comparison of the extracellular region (b) and the  $\beta$ 4- $\alpha$ 2 loop (c) of each complex, colored in the same manner as in Supplementary Fig. S3a.

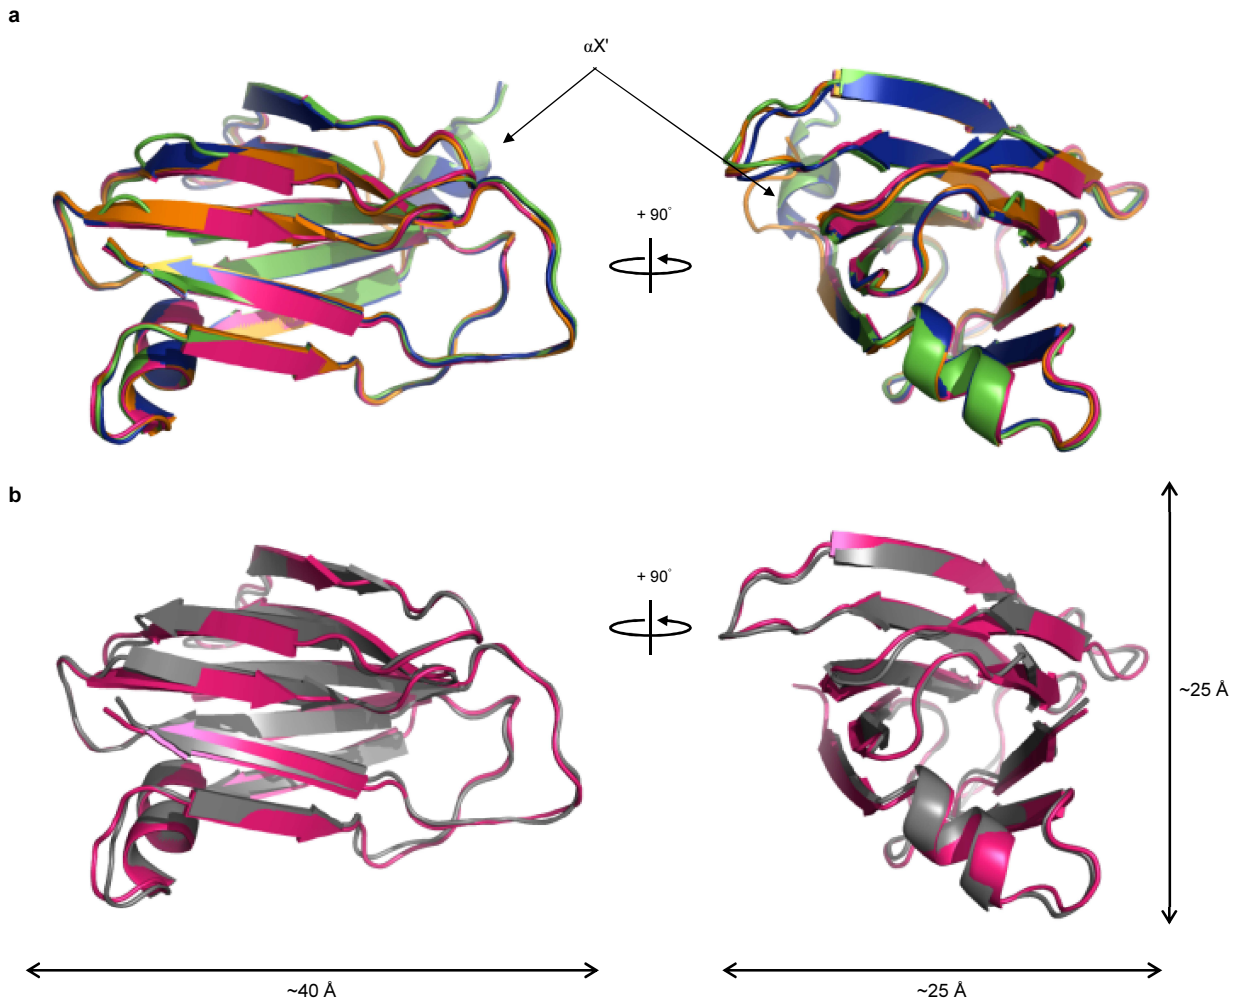

**Supplementary Figure S5 | Comparison between the C-CPE structures.** (a) Superimposition of the structures of the four independent C-CPE molecules, colored in the same manner as in Supplementary Fig. S3a, in the  $P4_3$  crystal of the T4L-claudin-4•C-CPE complex. (b) Superimposition of the structure of C-CPE in complex I with T4L-claudin-4 (pink) on that of C-CPE (residues 205–319) in the full-length, free form of CPE (PDB: 3AM2)<sup>17</sup> (gray).

Human claudin-1 to Human claudin-25 sequence alignment. Columns 1 and 2 list species. Column 3 shows the protein domain structure with labels α1, β1, V1 region, β2, β3, β4, and α2. Column 4 contains the amino acid sequence. Column 5 shows the residue number (86-119).

Human claudin-1 to Human claudin-25 sequence alignment. Columns 1 and 2 list species. Column 3 shows the protein domain structure with labels α1, β1, V1 region, β2, β3, β4, and α2. Column 4 contains the amino acid sequence. Column 5 shows the residue number (86-119).

Human claudin-1 to Human claudin-25 sequence alignment. Columns 1 and 2 list species. Column 3 shows the protein domain structure with labels α2, α3, and V2 region. Column 4 contains the amino acid sequence. Column 5 shows the residue number (103-153).

Human claudin-1 to Human claudin-25 sequence alignment. Columns 1 and 2 list species. Column 3 shows the protein domain structure with labels V2 region, β5, and α4. Column 4 contains the amino acid sequence. Column 5 shows the residue number (153-213).

Human claudin-1 to Human claudin-25 sequence alignment. Columns 1 and 2 list species. Column 3 shows the protein domain structure with labels β6 and β7. Column 4 contains the amino acid sequence. Column 5 shows the residue number (211-229).



**Supplementary Figure S6 | Sequence alignment of human claudins.** The identical residues, highly conserved residues, and homologous residues are boxed in red, orange and blue, respectively. The alignment was generated with Clustal Omega. The secondary structure elements of human claudin-4 are indicated above the sequences.

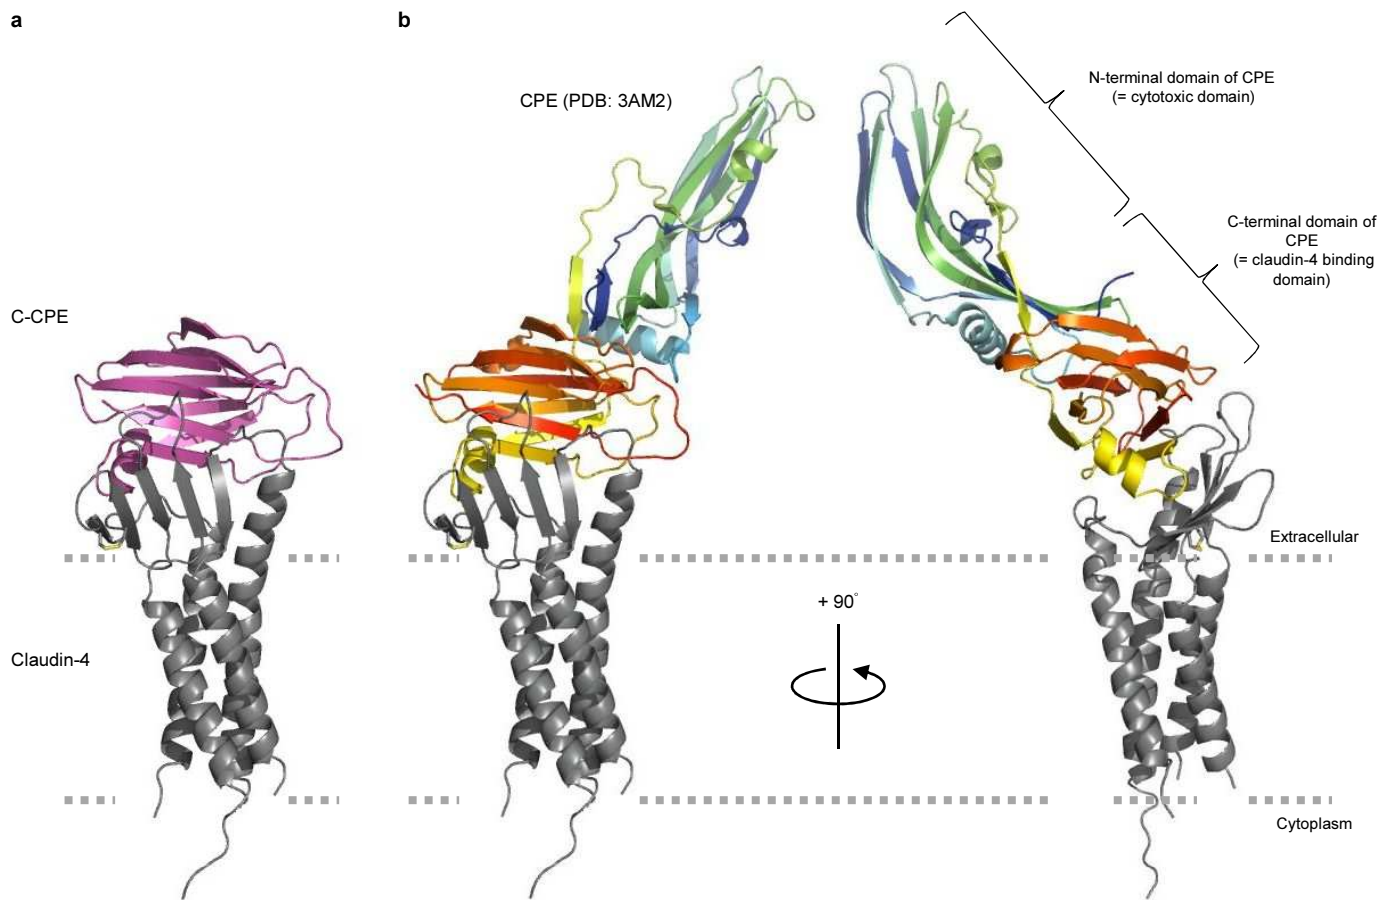

**Supplementary Figure S7 | A model of the human claudin-4•full-length CPE complex.** (a) The human claudin-4•C-CPE complex determined in this study. Human claudin-4 and C-CPE are colored gray and purple, respectively. (b) The model of the human claudin-4•full-length CPE complex, generated by the superimposition of the full-length CPE (PDB: 3AM2, ref.17) onto the C-CPE in the present structure. The full-length CPE is rainbow colored.

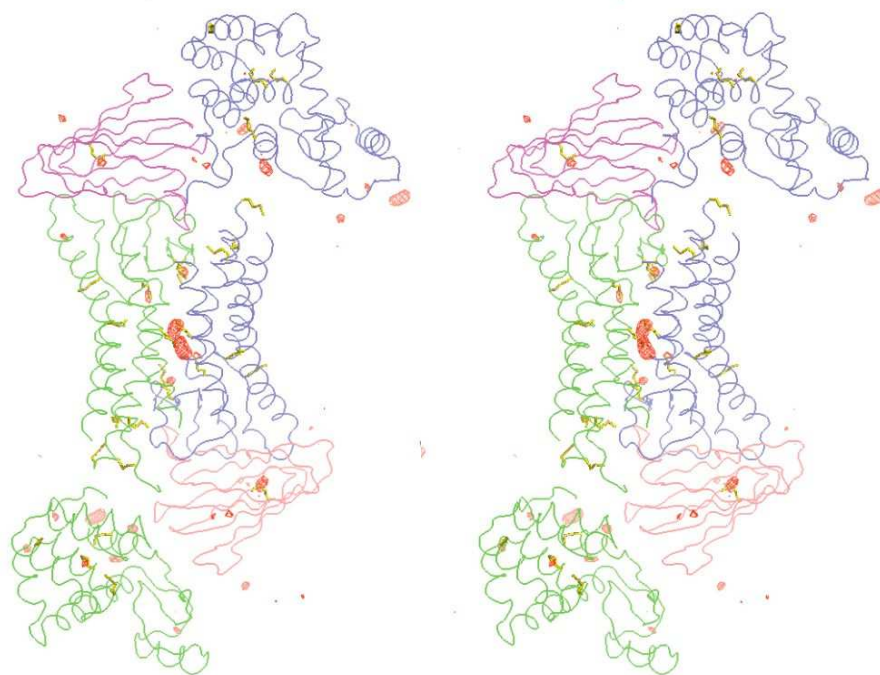

**Supplementary Figure S8 | Selenomethionine positions in the  $P4_32_12$  crystal structure of the SeMet-T4L-claudin-4•SeMet-C-CPE complex.** The asymmetric unit of the  $P4_32_12$  crystal, composed of two SeMet-T4L-claudin-4•SeMet-C-CPE complexes, is represented in a stereoview. In complex I, T4L-claudin-4 and C-CPE are colored green and purple, respectively. In complex II, T4L-claudin-4 and C-CPE are colored blue and pink, respectively. Anomalous difference densities, contoured at  $4 \sigma$ , are shown in red. Selenomethionines are represented by yellow sticks.

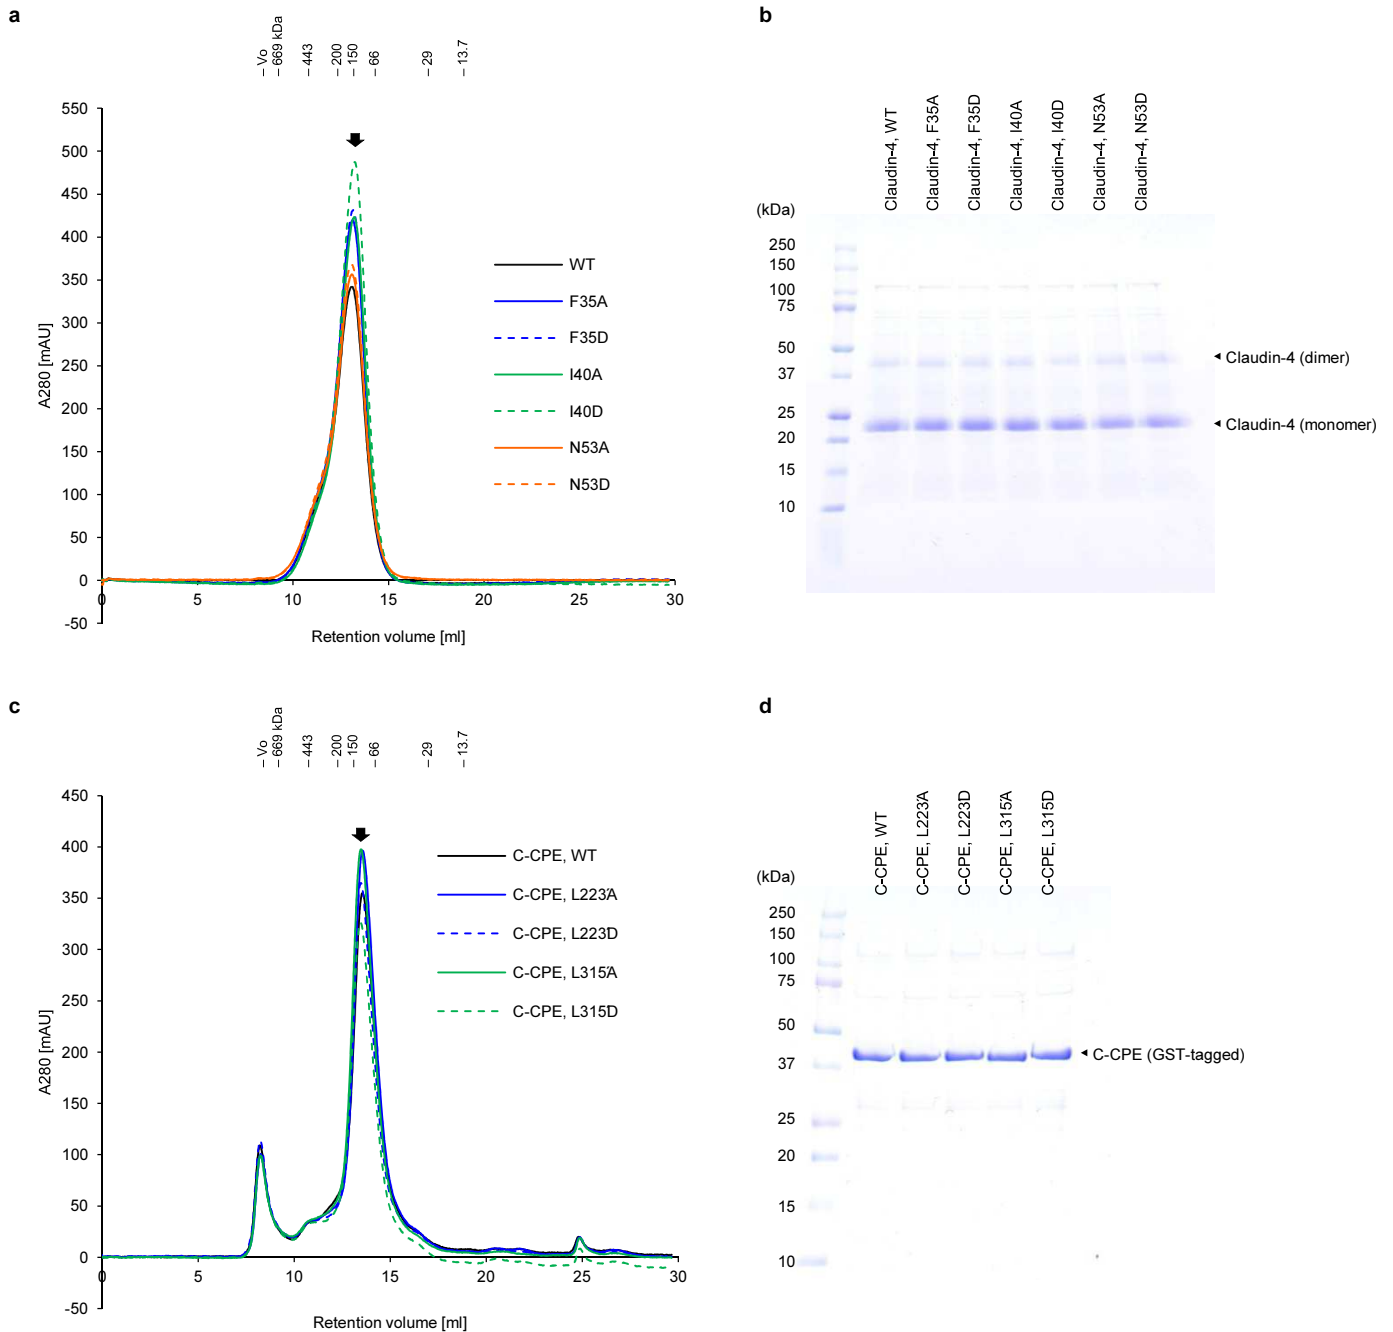

**Supplementary Figure S9 | Size-exclusion chromatography analysis of the claudin-4 mutants and the C-CPE mutants that appear in Fig. 4i-j.** (a, c) The Superdex 200 10/300 column (GE Healthcare) elution profiles of (a) the human claudin-4 mutants and (c) the GST-tagged C-CPE mutants. The protein samples were produced by the *E. coli* cell-free protein synthesis method, and purified by tag-affinity chromatography with the N11 tag at the N-terminus of the proteins. (b, d) The SDS-PAGE gel images of the peak fractions indicated by the black arrows in (a) and (c). In (b) and (d), 0.9  $\mu$ g and 0.5  $\mu$ g of protein were fractionated in each lane. SDS-PAGE gels were stained with Coomassie Brilliant Blue.

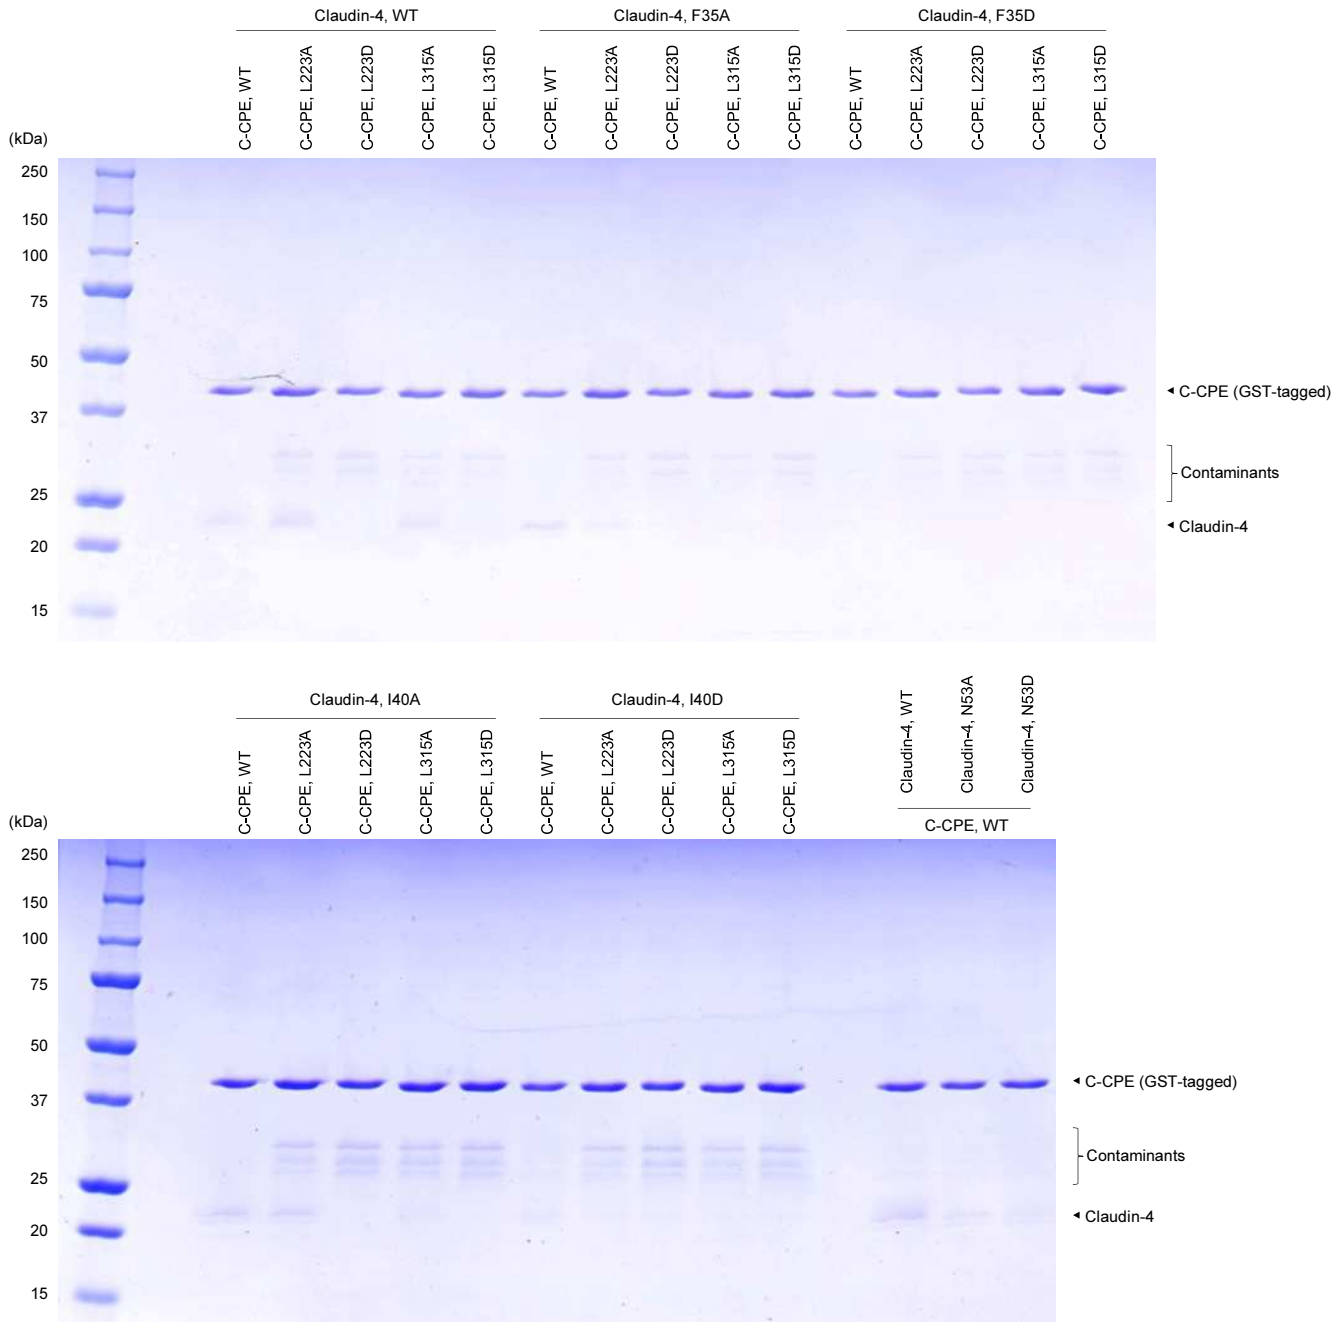

**Supplementary Figure S10 | SDS-PAGE gel images of the pull-down assay in Fig. 4i-j.** An equal volume of each eluate was applied to the well, and fractionated by SDS-PAGE with a 10–20% gradient gel. SDS-PAGE gels were stained with Coomassie Brilliant Blue.
